# Supplementary material for: The Association between Low Muscle Mass and Hepatic Steatosis in Asymptomatic Population in Korea
Source: MDPI journal article supplement (doi:10.3390/life11080848), 2021-08-19
Supplement: s1 [file s1]

**Supplementary Table 1.** Parameters associated with low muscle mass (class II)

| Variables                          | Odds ratio    | 95% confidence interval | P-value* |
|------------------------------------|---------------|-------------------------|----------|
| Age, years                         | 1.019         | 1.000-1.040             | 0.071    |
| Male                               | 2.483         | 1.510-4.084             | <0.001   |
| Hypertension                       | 1.902         | 1.262-2.868             | 0.002    |
| Diabetes mellitus                  | 1.495         | 0.873-2.557             | 0.143    |
| Hypercholesterolemia               | 1.195         | 0.776-1.839             | 0.419    |
| Current smoking                    | 1.080         | 0.661-1.767             | 0.758    |
| Body mass index, kg/m <sup>2</sup> | 1.607         | 1.476-1.748             | <0.001   |
| Fasting glucose, mg/dL             | 1.011         | 1.004-1.018             | 0.004    |
| Total cholesterol, mg/dL           | 1.006         | 1.001-1.011             | 0.015    |
| Triglyceride, mg/dL <sup>+</sup>   | 2.607         | 1.791-3.794             | <0.001   |
| HDL cholesterol, mg/dL             | 0.978         | 0.963-0.993             | 0.004    |
| AST, IU/L <sup>+</sup>             | 1.355         | 0.822-2.233             | 0.233    |
| ALT, IU/L <sup>+</sup>             | 2.056         | 1.432-2.953             | <0.001   |
| HS-CRP (mg/dL)                     | 1.947         | 1.296-2.924             | 0.001    |
| CAP, dB/m                          | 1.018         | 1.014-1.023             | <0.001   |
| CAP≥248dB/m                        | 4.825         | 2.855-8.154             | <0.001   |
| CAP≥302dB/m                        | 4.645         | 3.049-7.077             | <0.001   |
| LSM, kPa                           | 1.276         | 1.137-1.432             | <0.001   |
| LSM, tertile (1)                   | 1 (reference) |                         | <0.001   |
| tertile (2)                        | 2.118         | 1.162-3.859             | 0.014    |
| tertile (3)                        | 3.514         | 1.986-6.219             | <0.001   |

ALT, alanine aminotransferase; AST, aspartate aminotransferase; CAP, controlled attenuation parameter; HDL, high-density lipoprotein; HS-CRP, high sensitivity C-reactive protein; LSM, liver stiffness measurement. \* compared to no sarcopenia as reference, + log transformed

**Supplementary Table 2.** Subgroup analysis of hepatic steatosis in relation with low muscle mass (class I) according to obesity.

|                              | Non-obese        |                 | Obese            |                 |
|------------------------------|------------------|-----------------|------------------|-----------------|
|                              | OR (95% CI)      | <i>P</i> -value | OR (95% CI)      | <i>P</i> -value |
| CAP≥248 (vs <248) dB/m       | 2.22 (1.46-3.37) | <0.001          | 2.04 (1.10-3.78) | 0.024           |
| CAP Grade                    |                  | <0.001*         |                  | 0.007*          |
| CAP ≥248, <302 (vs <248)dB/m | 1.74 (1.05-2.88) | 0.033           | 1.34 (0.67-2.69) | 0.407           |
| CAP ≥302 (vs <248) dB/m      | 2.90 (1.74-4.85) | <0.001          | 2.95 (1.45-5.98) | 0.003           |
| Liver stiffness measurement  |                  |                 |                  |                 |
| T3 (vs T1) <sup>§</sup>      | 2.04 (1.25-3.32) | 0.004           | 2.23 (1.12-4.45) | 0.022           |

ALT, alanine aminotransferase; CAP, controlled attenuation parameter; OR, odds ratio; CI, confidence interval; HS-CRP, high sensitivity C-reactive protein. Adjusted for age, sex, hypertension, diabetes, hypercholesterolemia, triglyceride, high-density lipoprotein cholesterol, hs-CRP, and ALT. \* overall P-value.

<sup>§</sup>liver stiffness measurement in tertile, T1 vs. T3.
